# Supplementary material
Source: PubMed Central journal article supplement (PMC4284592)
Supplement: pnas.201407401SI.pdf [file pnas.201407401SI.pdf]

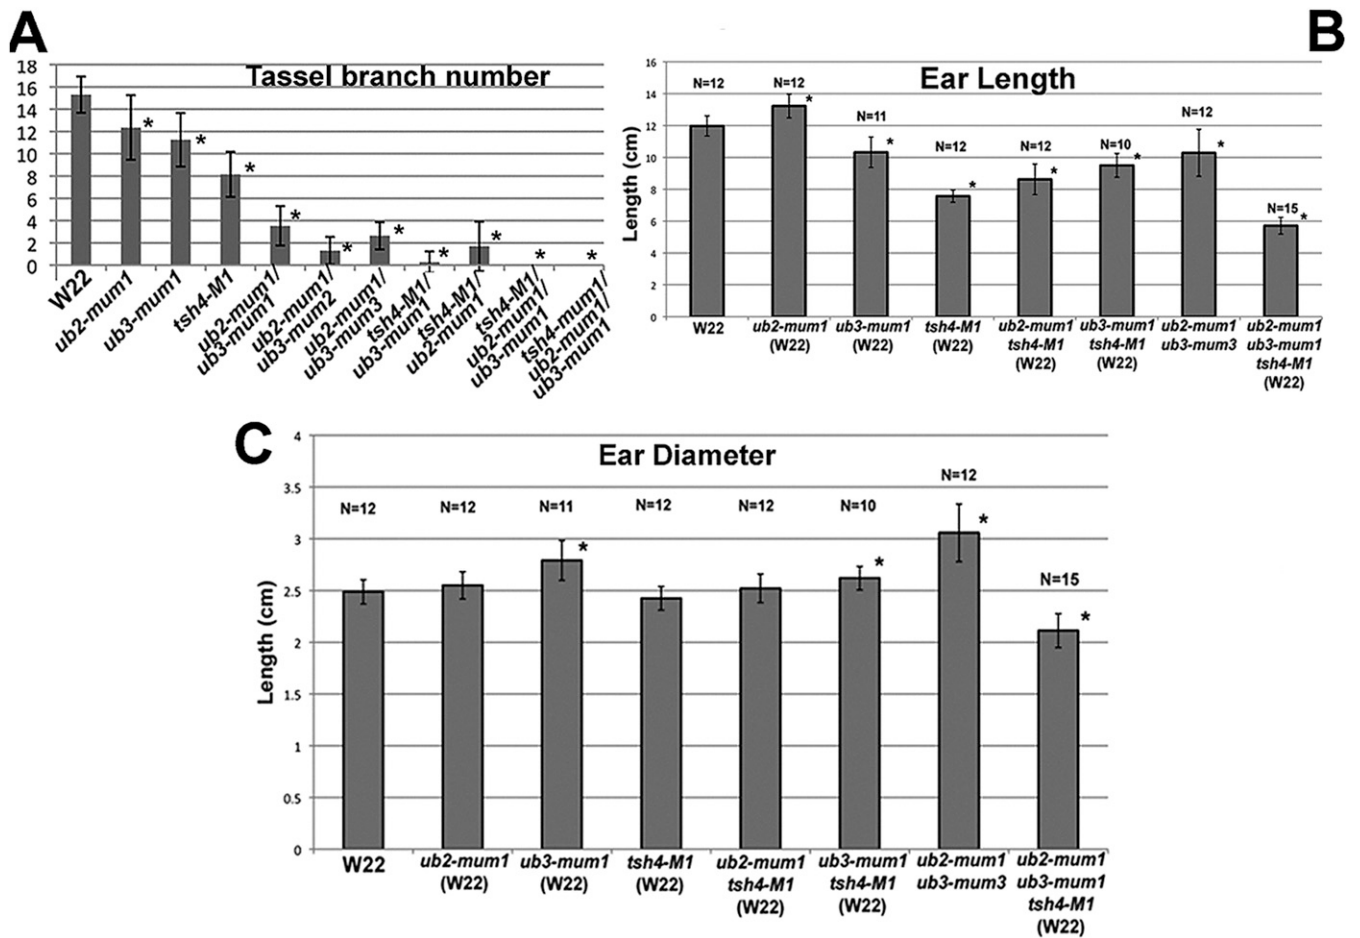

Fig. 53. Tassel and ear measurements of *SBP-box* mutants. (A) TBN in W22, *ub2*, *ub3*, and *tsh4* double- and triple-mutant combinations. \*Significant differences with W22 ( $P$  value < 0.0003 was calculated by  $t$  test). (B) Average lengths of inbred W22 and *SBP-box* mutant ears. Error bar = SD. All mutants are significantly different from W22 based on two-tailed  $t$  tests. \* $P$  value < 0.0024. (C) Average diameters of W22 and *SBP-box* mutant ears at midpoint. Only single-, double-, and triple-mutant combinations with *ub3* are significantly different from the inbred based on two-tailed  $t$  tests. Error bar = SD. \* $P$  value < 0.0143.



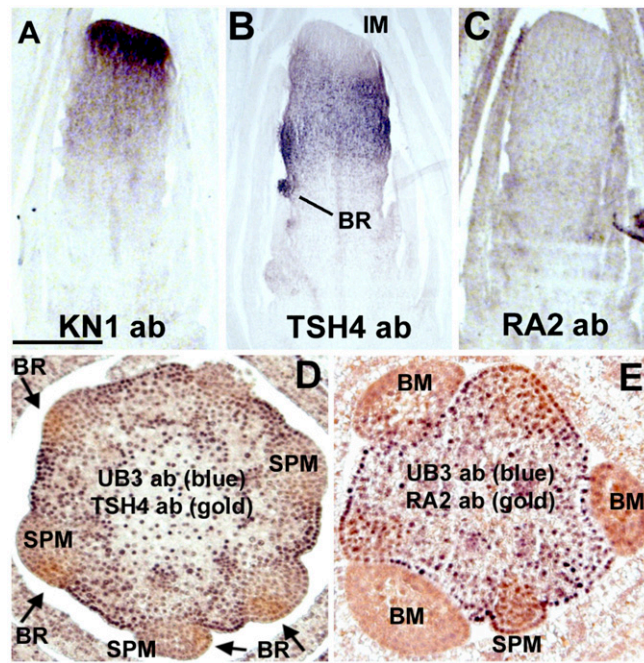

**Fig. S5.** Immunolocalization of early meristem markers in mutant and WT tassels. (A–C) Immunolocalization in adjacent sections of *ub2-mum1/ub3-mum3* tassel. (A) KN1 immunolocalization showing expression only in the IM. (B) TSH4 immunolocalization showing expression in stem and early bract primordia (BR). (C) RA2 immunolocalization showing lack of expression. (Scale bars: A–C, 500  $\mu$ m.) (D) Double labeling of WT tassel with UB3 (blue) and TSH4 (gold) antibodies. The proteins occupy separate domains in the SPM; UB3 is absent from the SPM, whereas TSH4 is present in the BR of the SPM (arrows). (E) Double labeling of the base of WT tassel with UB3 (blue) and RA2 (gold). UB3 is absent from the BM and SPM, whereas RA2 is present in both.

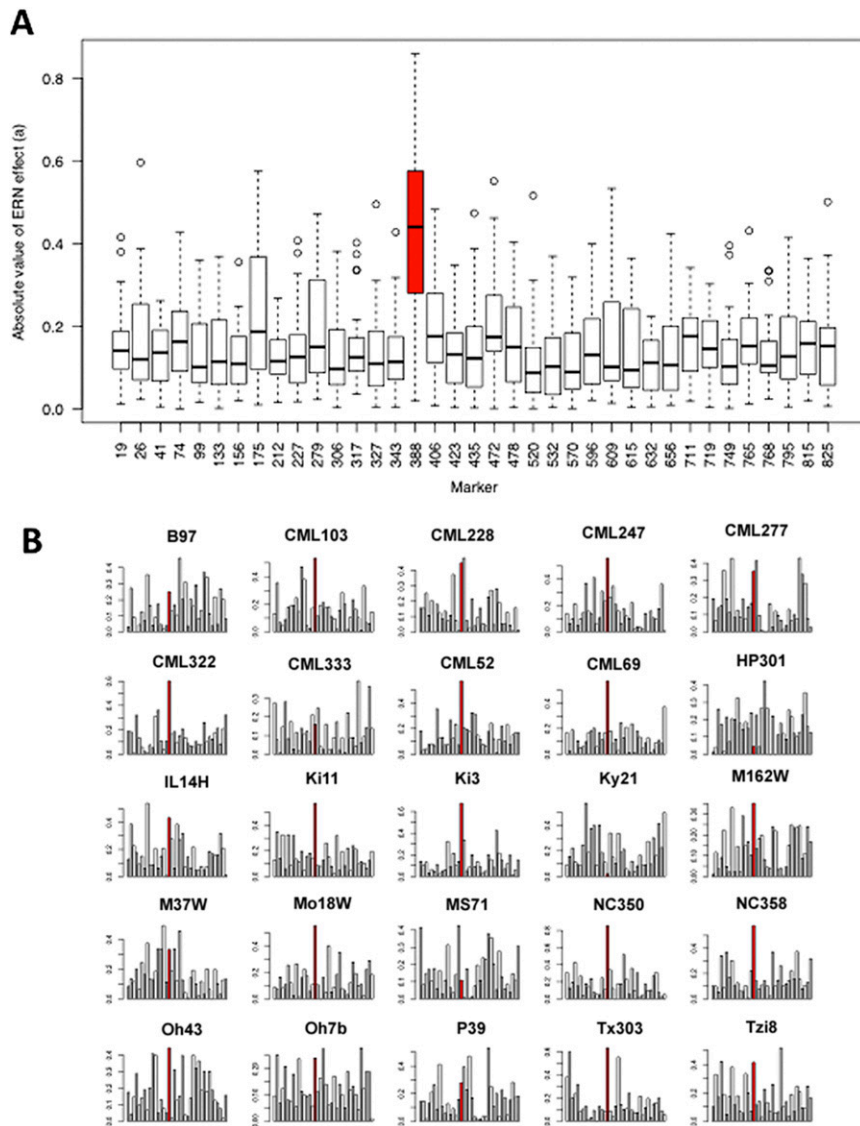

**Fig. S6.** QTL effects for ERN in the NAM population. (A) QTL effects from joint linkage analysis across the entire NAM population. (B) Joint linkage QTL effects separated by family. The *ub3*-linked ERN QTL is shown in red.



**Table S1. Comparison of joint linkage and GWAS effects at *ub3*-linked QTL with genotypes underlying candidate polymorphisms**

|        | ERN            |                   |                        | TBN            |                   |                        |
|--------|----------------|-------------------|------------------------|----------------|-------------------|------------------------|
|        | Joint linkage* | GWAS <sup>†</sup> | Ser220Asn <sup>‡</sup> | Joint linkage* | GWAS <sup>†</sup> | Val260Met <sup>‡</sup> |
| B97    | -0.24          | 1                 | 1                      | 0.52           | 1                 | 0                      |
| CML103 | -0.5           | 1                 | 1                      | 0.57           | 1                 | 1                      |
| CML228 | -0.48          | 1                 | 1                      | NS             | 0                 | 0                      |
| CML247 | -0.52          | 1                 | 1                      | 0.36           | 1                 | 0                      |
| CML277 | -0.32          | 1                 | 1                      | NS             | 0                 | 0                      |
| CML322 | -0.54          | 1                 | 1                      | NS             | 1                 | 0                      |
| CML333 | -0.21          | 1                 | 1                      | NS             | 1                 | 0                      |
| CML52  | -0.62          | 1                 | 1                      | NS             | 0                 | 0                      |
| CML69  | -0.61          | 1                 | 1                      | NS             | 0                 | 0                      |
| HP301  | NS             | 0                 | 0                      | NS             | 0                 | 0                      |
| IL14H  | -0.42          | 1                 | 1                      | NS             | 0                 | 0                      |
| Ki11   | -0.6           | 1                 | 1                      | NS             | 0                 | 0                      |
| Ki3    | -0.66          | 1                 | 1                      | NS             | 0                 | 0                      |
| Ky21   | NS             | 1                 | 1                      | NS             | 0                 | 0                      |
| M162W  | -0.32          | 1                 | 1                      | NS             | 0                 | 0                      |
| M37W   | -0.35          | 1                 | 1                      | NS             | 0                 | 0                      |
| Mo17   | -0.44          | 1                 | 1                      | 0.56           | 1                 | 1                      |
| Mo18W  | -0.54          | 1                 | 1                      | NS             | 0                 | 0                      |
| MS71   | NS             | 0                 | 1                      | 0.28           | 0                 | 0                      |
| NC350  | -0.83          | 1                 | 1                      | -0.39          | 0                 | 0                      |
| NC358  | -0.57          | 1                 | 1                      | NS             | 0                 | 0                      |
| OH43   | -0.37          | 1                 | 1                      | -0.58          | 0                 | 0                      |
| OH7B   | -0.23          | 1                 | 1                      | 0.67           | 1                 | 1                      |
| P39    | -0.38          | 1                 | 1                      | NS             | 0                 | 0                      |
| Tx303  | -0.65          | 1                 | 1                      | 0.45           | 1                 | 1                      |
| TZ18   | -0.36          | 1                 | 1                      | NS             | 0                 | 0                      |

Effects/alleles that differ significantly from B73 are shaded.

\*Joint linkage QTL effects. Effects not significant (NS) in an individual family ( $P \geq 0.05$ ) are marked.

<sup>†</sup>Genotypes of the most significant SNP in each genome-wide association study (GWAS) analysis; 0 indicates the reference genome (B73) genotype.

<sup>‡</sup>Genotypes of the nonsynonymous SNPs in the third exon of *ub3* at 199,457,549 and 199,457,430.
